# Supplementary material
Source: Elsevier journal article supplement (https://www.sciencedirect.com/science/article/pii/S1885585718302391)

## SUPPLEMENTARY MATERIAL

**Table 1 of the supplementary material**

Device Failure and Individual Contributors According to Prosthesis Oversizing

|                       |                       | Categories of OS  |                        |                    |                     |                      |                     |                   |
|-----------------------|-----------------------|-------------------|------------------------|--------------------|---------------------|----------------------|---------------------|-------------------|
|                       | All patients<br>(804) | ≤ -5%<br>(n = 85) | -4% to 0%<br>(n = 116) | 1%-5%<br>(n = 152) | 6%-10%<br>(n = 149) | 11%-15%<br>(n = 131) | 16%-20%<br>(n = 93) | > 20%<br>(n = 78) |
| <i>Device failure</i> | 71 (9)                | 7 (8)             | 17 (15)                | 17 (11)            | 11 (7)              | 6 (5)                | 8 (9)               | 5 (6)             |
| Procedural mortality  | 3 (0.4)               | 1 (1)             | 1 (1)                  | 0 (0)              | 0 (0)               | 0 (0)                | 1 (1)               | 0 (0)             |
| Elevated gradient*    | 47 (6)                | 3 (4)             | 10 (9)                 | 14 (9)             | 7 (5)               | 5 (4)                | 4 (4)               | 4 (5)             |
| PVL II+               | 14 (2)                | 2 (2)             | 4 (3)                  | 3 (2)              | 4 (3)               | 0 (0)                | 0 (0)               | 1 (1)             |
| Multiple valves       | 9 (1)                 | 2 (2)             | 3 (3)                  | 0 (0)              | 1 (1)               | 1 (1)                | 2 (2)               | 0 (0)             |
| <i>Conversion</i>     | 5 (1)                 | 1 (1)             | 0 (0)                  | 0 (0)              | 0 (0)               | 1 (1)                | 3 (3)               | 0 (0)             |

Data are expressed as No. (%).

OS, prosthesis oversizing; PVL II+, paravalvular leakage grade II or more.

\*Defined as mean transaortic gradient ≥ 20 mmHg on discharge transthoracic echocardiography.

**Table 2 of the supplementary material**

Multivariate Predictors of Device Failure

| Variable                                             | Adjusted OR | 95%CI       | <i>P</i> |
|------------------------------------------------------|-------------|-------------|----------|
| OS (per each % increase)                             | 0.997       | 0.971-1.024 | .838     |
| Female sex                                           | 1.037       | 0.515–2.088 | .920     |
| Peripheral artery disease                            | 0.425       | 0.128-1.413 | .163     |
| Diabetes mellitus                                    | 0.602       | 0.312-1.161 | .130     |
| Preprocedural mean gradient (per each mmHg increase) | 1.021       | 1.006-1.037 | .007     |
| Atrial fibrillation                                  | 0.723       | 0.354-1.478 | .374     |
| Size (per each size increase)                        | 0.401       | 0.237-0.678 | .001     |
| Mean implantation depth, mm                          | 0.955       | 0.819–1.115 | .562     |

95%CI, 95% confidence interval; OR, odds ratio; OS, oversizing.

**Table 3 of the supplementary material**

Indication for Patients Requiring PPI

| Indication               | Total PPI<br>(n = 115) |
|--------------------------|------------------------|
| Persistent AV-block III  | 43 (37.4)              |
| Transient AV-block III   | 22 (19.2)              |
| Intermittent AV-block II | 12 (10.4)              |
| LBBB and AV-block I      | 5 (4.3)                |
| Sick sinus syndrome      | 6 (5.2)                |
| Bradycardia              | 27 (23.5)              |

The data are expressed as No. (%).

AV-block, atrioventricular block; PPI, permanent pacemaker implantation; LBBB, complete left bundle branch block.

**Table 4 of the supplementary material**

Multivariate Predictors of PPI at 30 days

| OR                                       | Adjusted<br>OR | 95%CI        | <i>P</i> |
|------------------------------------------|----------------|--------------|----------|
| OS (per each % increase)                 | 1.028          | 1.005-1.051  | .017     |
| Age (per each year increase)             | 1.034          | 0.992-1.077  | .114     |
| Female sex                               | 1.410          | 0.788-2.520  | .247     |
| Logistic EuroSCORE (per each % increase) | 0.999          | 0.979-1.019  | .935     |
| NYHA III/IV                              | 1.741          | 0.997-3.043  | .051     |
| Pulmonary artery pressure > 60mmHg       | 1.992          | 1.002-3.961  | .049     |
| Atrial fibrillation                      | 1.715          | 1.073-2.742  | .024     |
| Complete right bundle branch block       | 6.203          | 3.471-11.085 | <.001    |
| Bicuspid valve                           | 2.121          | 0.872-5.156  | .097     |
| Size (per each size increase)            | 1.166          | 0.794-1.710  | .432     |
| Mean implantation depth, mm              | 1.061          | 0.942-1.196  | .329     |

95%CI, 95% confidence interval; NYHA, New York Heart Association functional class; OR, odds ratio;

OS, oversizing; PPI, permanent pacemaker implantation;

**Figure 1 of the supplementary material.** Example of different degrees of prosthesis oversizing by area, prosthesis parameters, and sizing recommendations for the SAPIEN 3. Examples for different degrees of oversizing (-18%, +9%, and +23%) according to the formula  $\text{prosthesis outer area}/\text{patient aortic annular area}-1)*100$ . For more details see methods section. OS, oversizing.

|                                                                                                                                                                                                     |  |  | 23mm                                                                                                                                                                                                | 26mm            | 29mm            |                |
|-----------------------------------------------------------------------------------------------------------------------------------------------------------------------------------------------------|--|--|-----------------------------------------------------------------------------------------------------------------------------------------------------------------------------------------------------|-----------------|-----------------|----------------|
| 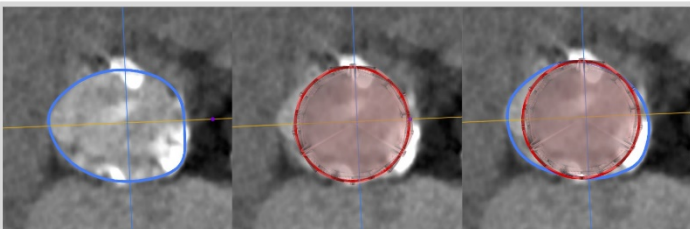<br>Annular Area: 7.93cm <sup>2</sup> Nominal Prosthesis Area (SAPIEN 3 29mm: 6.48cm <sup>2</sup> )      OS: - 18% |  |  | <b>Prosthesis dimensions</b>                                                                                                                                                                        |                 |                 |                |
|                                                                                                                                                                                                     |  |  | Frame height (mm)                                                                                                                                                                                   | 18              | 20              | 22.5           |
|                                                                                                                                                                                                     |  |  | Outer diameter (mm)                                                                                                                                                                                 | 22.75           | 25.71           | 28.75          |
|                                                                                                                                                                                                     |  |  | Outer perimeter (mm)                                                                                                                                                                                | 71.47           | 80.74           | 90.32          |
|                                                                                                                                                                                                     |  |  | Outer area (cm <sup>2</sup> )                                                                                                                                                                       | 4.06            | 5.19            | 6.48           |
| <br>Annular Area: 5.93cm <sup>2</sup> Nominal Prosthesis Area (SAPIEN 3 29mm: 6.48cm <sup>2</sup> )      OS: 9%   |  |  | <b>Sizing recommendations and range</b>                                                                                                                                                             |                 |                 |                |
|                                                                                                                                                                                                     |  |  | Area (cm <sup>2</sup> )                                                                                                                                                                             | 3.38-4.30       | 4.30-5.46       | 5.40-6.80      |
|                                                                                                                                                                                                     |  |  | Area-derived diameter (mm)                                                                                                                                                                          | 20.7-23.4       | 23.4-26.4       | 26.2-29.4      |
|                                                                                                                                                                                                     |  |  | OS (%)                                                                                                                                                                                              | -5.6% to +20.1% | -4.9% to +20.7% | -4.6% to 20.2% |
|                                                                                                                                                                                                     |  |  | <br>Annular Area: 4.24cm <sup>2</sup> Nominal Prosthesis Area (SAPIEN 3 26mm: 5.19cm <sup>2</sup> )      OS: 23% |                 |                 |                |

**Figure 2 of the supplementary material.** Distribution of cases among categories of OS, pre- and postdilatation and prosthesis sizes. Distribution of patients within the prosthesis oversizing categories. Median values of OS for each category are given. Pre- and postdilatation rates as well as prosthesis size used within each category are given. OS, oversizing.

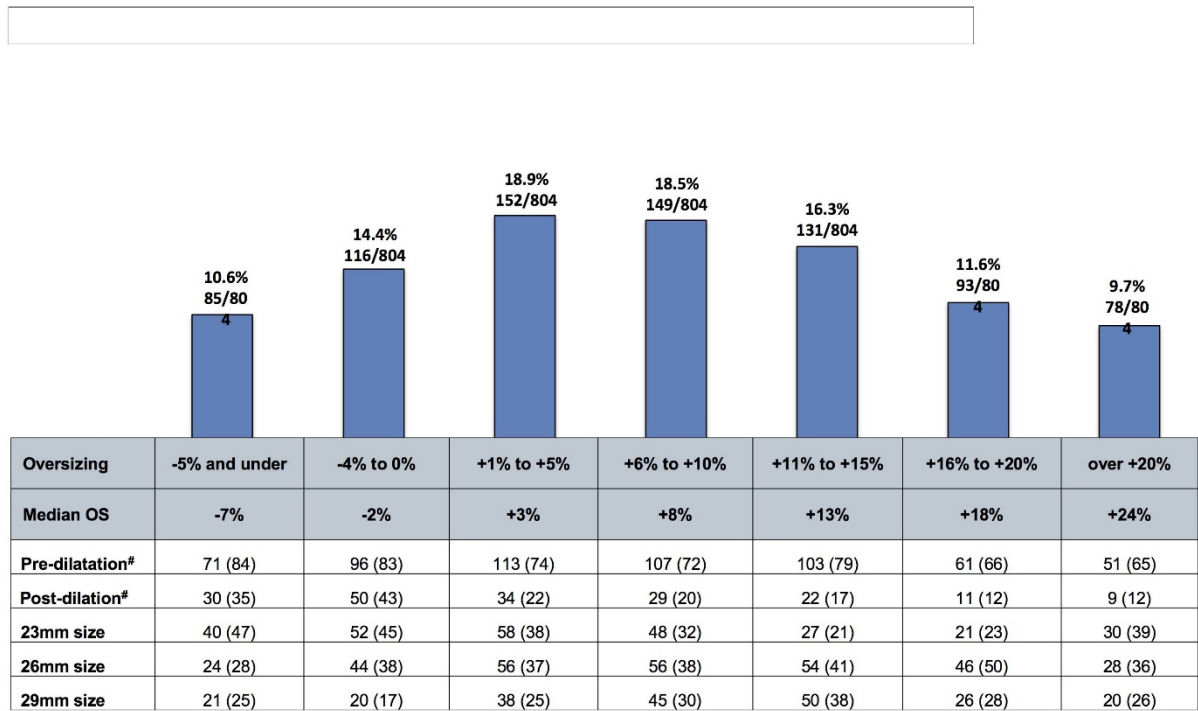

Supplement: mmc1 [file S1885585718302391:mmc1.pdf]
